# Supplementary material for: Promotion effect of free Ag+ ions on photocatalytic dechlorination processes
Source: Royal Society of Chemistry journal article supplement (doi:10.1039/d1cy02210e), 2022-01-01
Supplement: d1cy02210e1.pdf [file d1cy02210e1.pdf]

Supporting Information

## Promotion effect of free $\text{Ag}^+$ ions for photocatalytic dechlorination processes

Meng Tian, Jing Qian, Jiawei Hou, Yadi Bai, Hai-Ying Jiang\*, Jingyun Ren\*

Key Lab of Synthetic and Natural Functional Molecule Chemistry of Ministry of Education, and the Energy and Catalysis Hub, College of Chemistry and Materials Science, Northwest University, Xi'an 710127, People's Republic of China

jianghy@nwu.edu.cn, jyrenchem@nwu.edu.cn

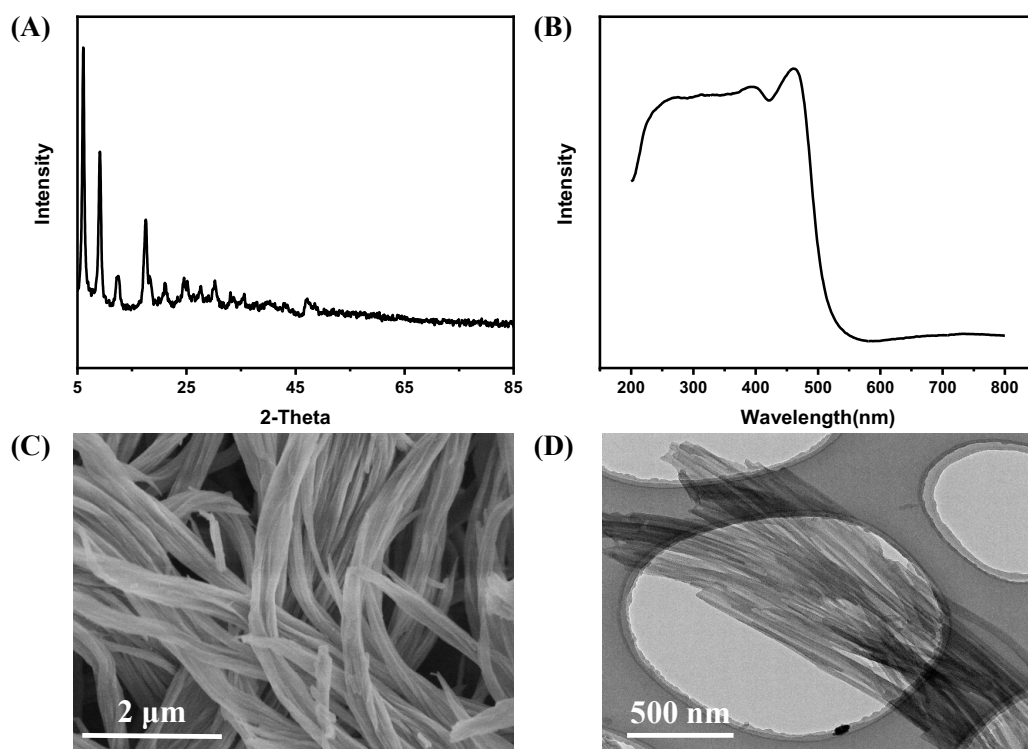

**Figure. S1** (A) XRD pattern of  $\text{PhC}_2\text{Cu}$ ; (B) UV-visible diffuse reflectance spectroscopy of  $\text{PhC}_2\text{Cu}$ ; (C) SEM images of  $\text{PhC}_2\text{Cu}$ ; (D)TEM images of  $\text{PhC}_2\text{Cu}$ .

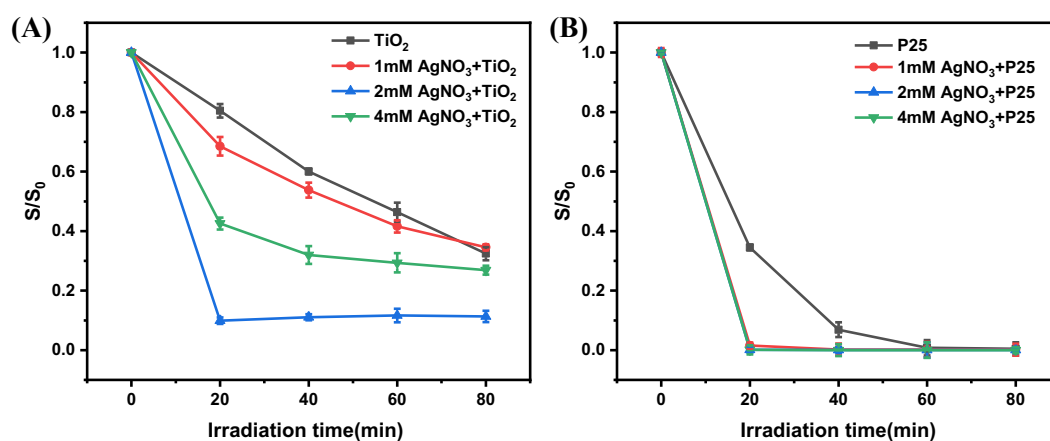

**Figure. S2** Photocatalytic degradation of 2,4-DCP in the absence and presence of  $\text{AgNO}_3$  by  $\text{TiO}_2$  (A) and P25 (B).

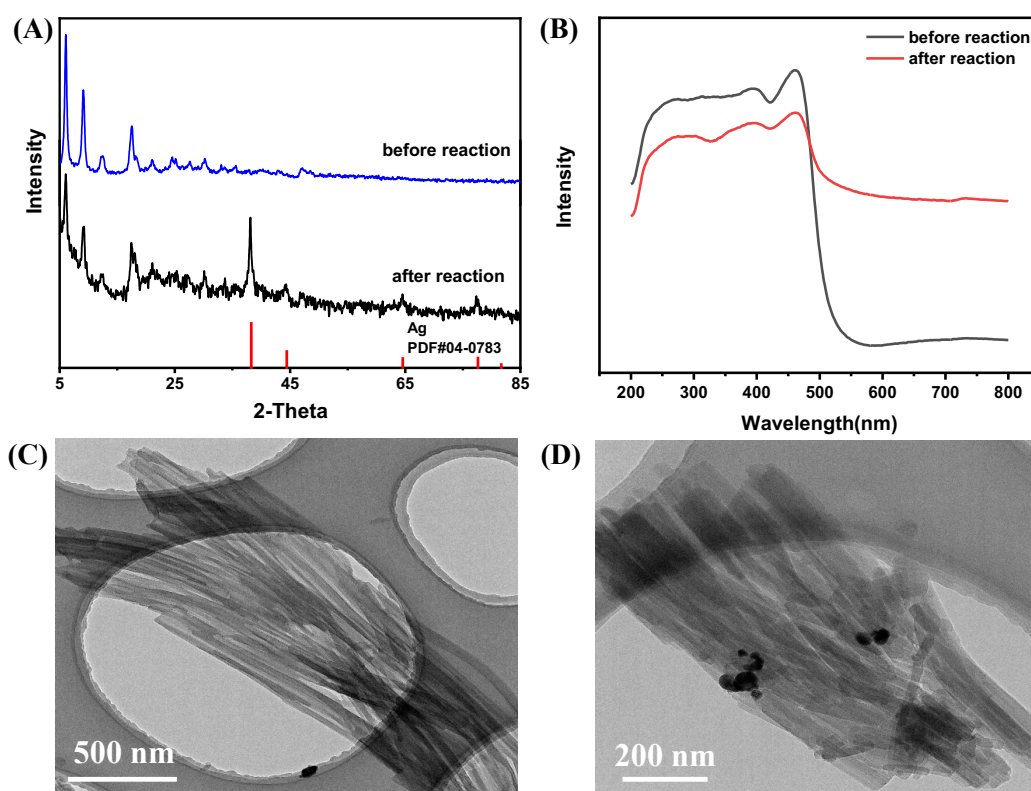

**Figure. S3** (A) XRD spectra of  $\text{PhC}_2\text{Cu}$  before and after the photocatalytic reaction; (B) UV-visible diffuse reflectance spectroscopy of  $\text{PhC}_2\text{Cu}$  before and after the photocatalytic reaction; TEM images of  $\text{PhC}_2\text{Cu}$  before (C) and after (D) photocatalytic reaction.

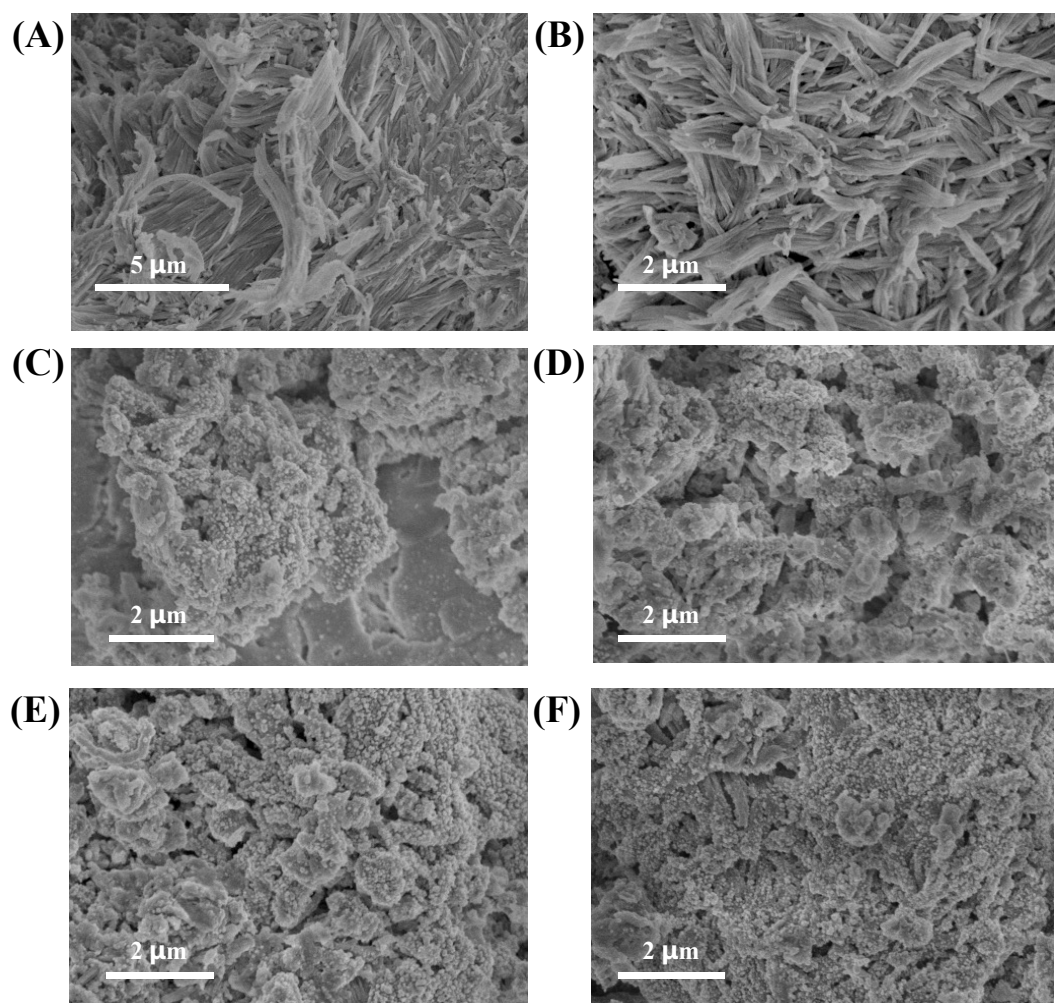

**Figure. S4** (A) SEM images of PhC<sub>2</sub>Cu sample; SEM images of the PhC<sub>2</sub>Cu sample after the 1st cycling experiment (B), the 2nd cycling experiment (C), the 3rd cycling experiment (D), the 4th cycling experiment (E) and the 5th cycling experiment (F).

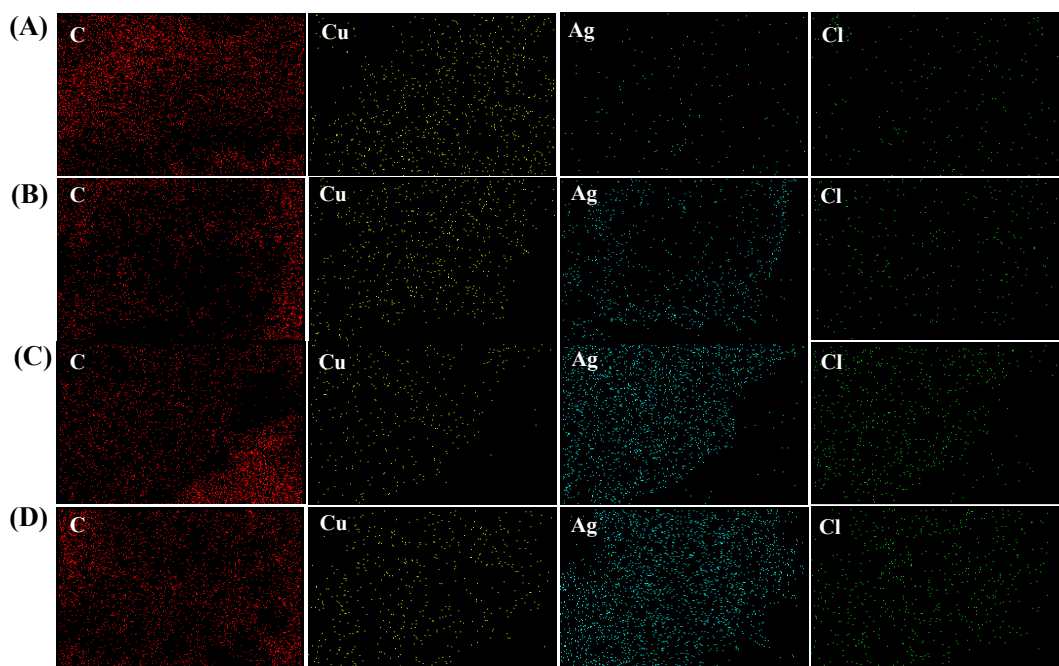

**Figure. S5** (A) SEM mapping image of PhC<sub>2</sub>Cu sample; SEM mapping images of the PhC<sub>2</sub>Cu sample after the 1st cycling experiment (B), the 3rd cycling experiment (C) and the 6th cycling experiment (D).

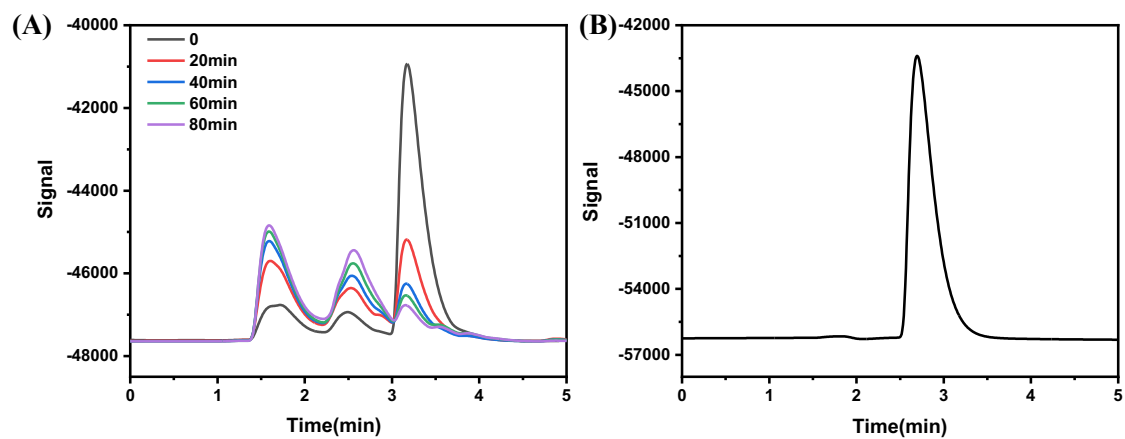

**Figure. S6** (A) HPLC of 2,4-DCP solution during the photocatalytic degradation experiments in the presence of 2 mM AgNO<sub>3</sub>; (B) Chromatograms of phenol standard solutions (2 × 10<sup>-4</sup> M).

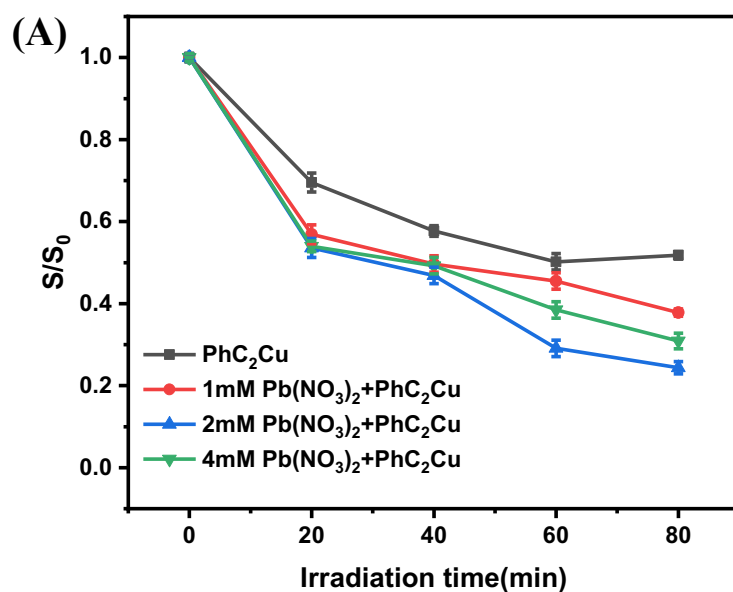

**Figure. S7** (A) Photocatalytic degradation of 2,4-DCP over the PhC<sub>2</sub>Cu sample in different Pb(NO<sub>3</sub>)<sub>2</sub> concentration systems

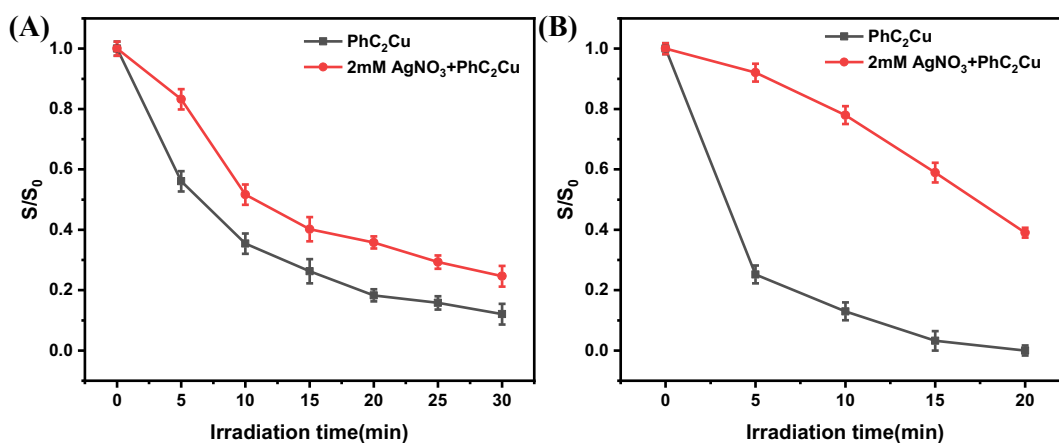

**Figure. S8** (A) Photocatalytic degradation of PBP over the PhC<sub>2</sub>Cu sample in different AgNO<sub>3</sub> concentration systems; (B) Photocatalytic degradation of 2,4,6-TCP over the PhC<sub>2</sub>Cu sample in different AgNO<sub>3</sub> concentration systems.
